# Supplementary material
Source: PubMed Central journal article supplement (PMC3349258)
Supplement: neo1404_0324SD1.pdf [file neo1404_0324SD1.pdf]

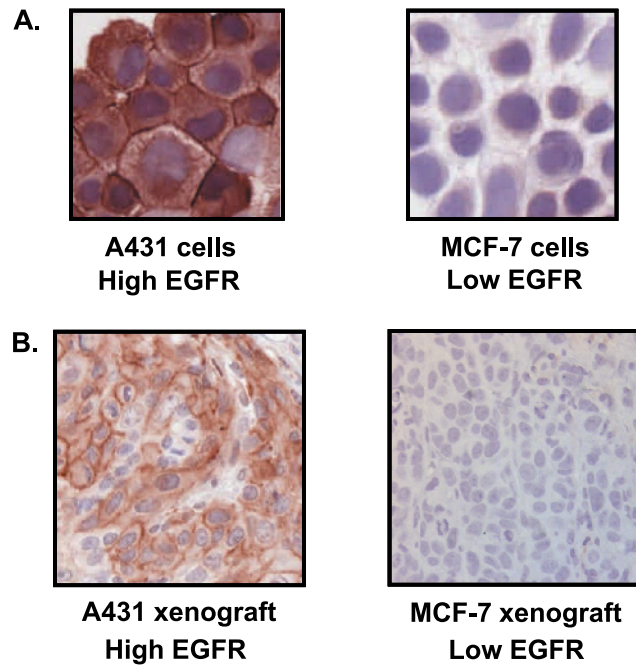

**Figure W1.** EGFR expression in (A) human squamous cell carcinoma (A431) and human breast cancer (MCF-7) cells and (B) A431 and MCF-7 xenografts.
